# Supplementary material for: Native point defects in antiperovskite Ba3SbN: a promising semiconductor for photovoltaics
Source: Royal Society of Chemistry journal article supplement (doi:10.1039/d3cp00619k), 2023-01-01
Supplement: d3cp00619k1.pdf [file d3cp00619k1.pdf]

# Native Point Defects in Antiperovskite Ba<sub>3</sub>SbN: Promising Semiconductor for Photovoltaics

Youngho Kang\*

*Department of Materials Science and Engineering, Incheon National University, Incheon  
22012, Korea*

Keywords: Antiperovskite; Nitride; Point defects; Density functional theory

\*Corresponding author

E-mail address: [youngho84@inu.ac.kr](mailto:youngho84@inu.ac.kr)

Figure S1. Atomic structures of the vacancies in the neutral state.

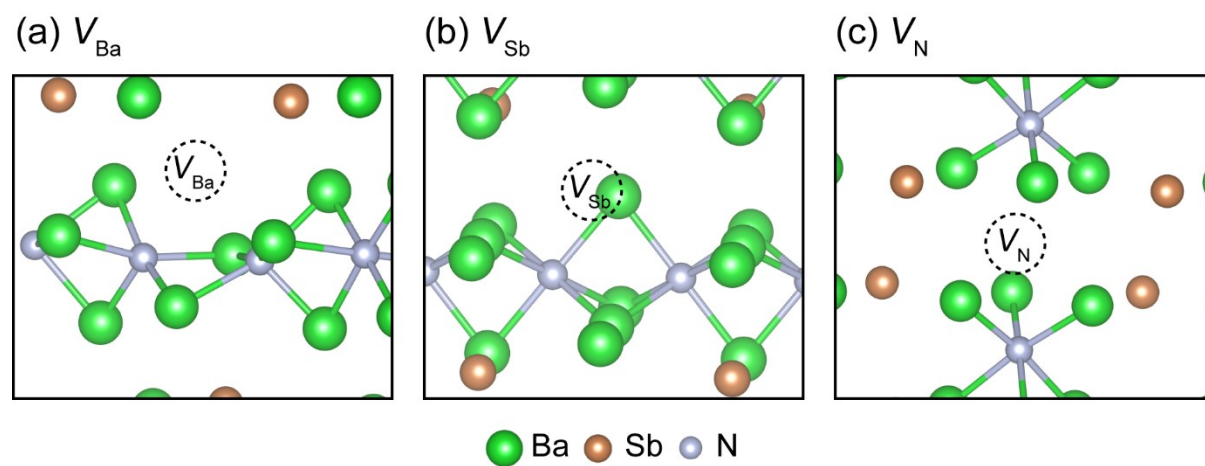

Figure S2. Atomic structures of the interstitials in the neutral state.

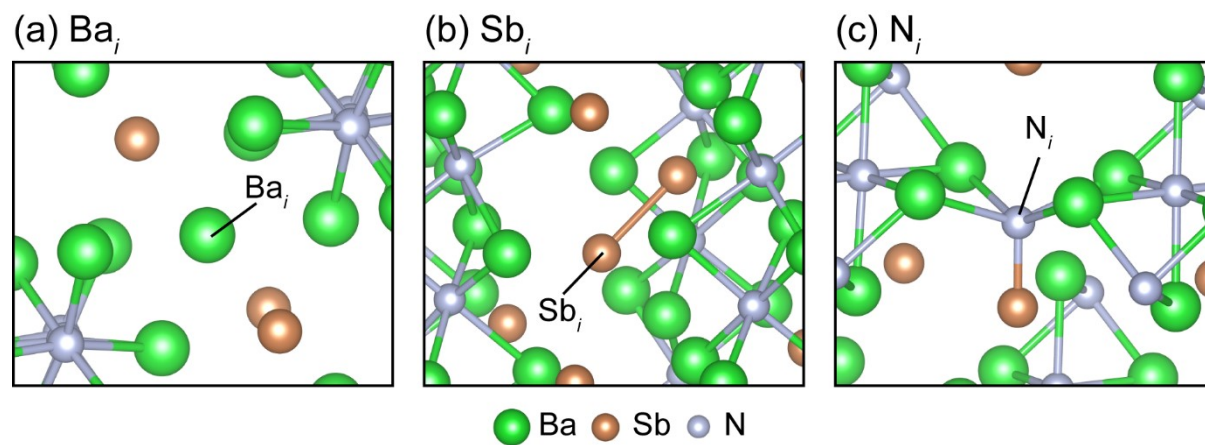

Figure S3. Atomic structures of the antisites in the neutral state.

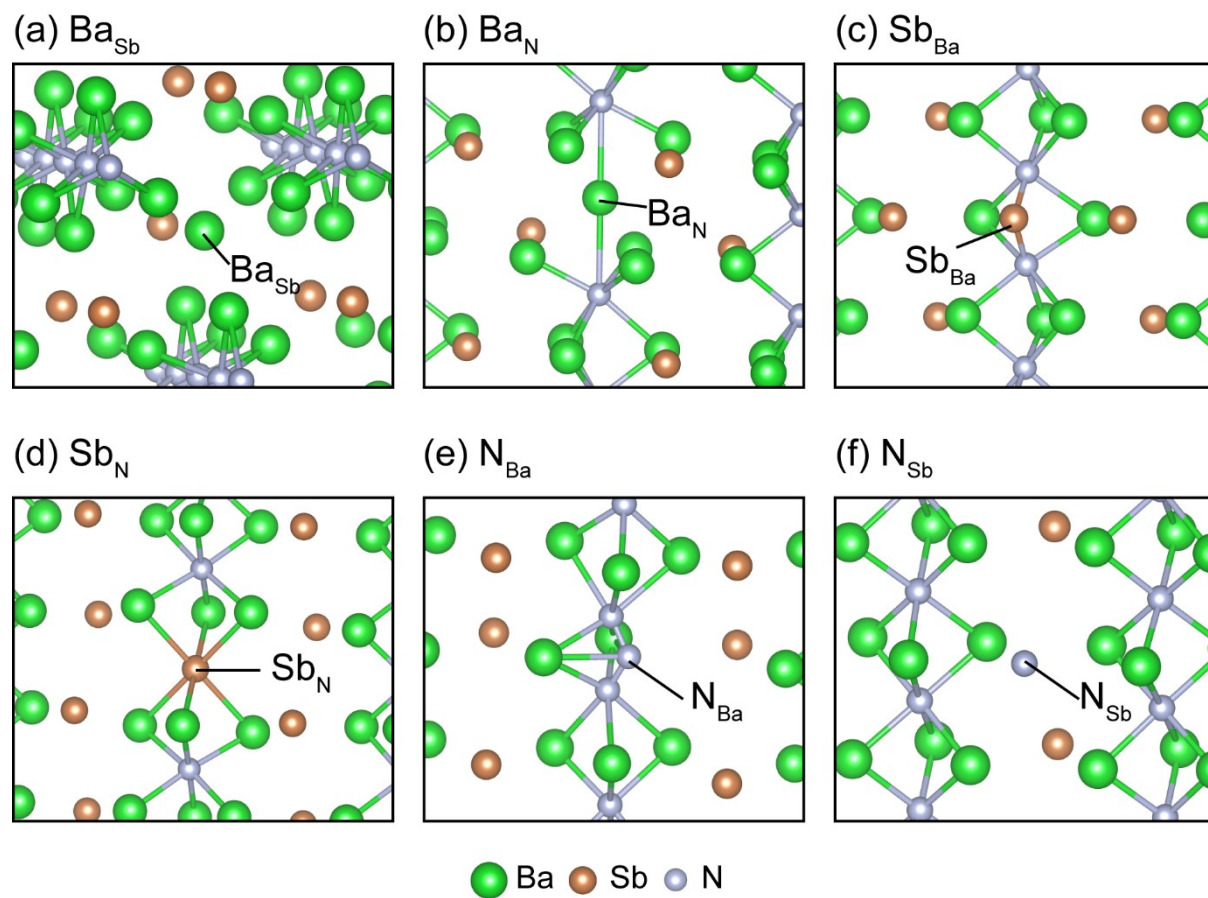

Figure S4. Overlap matrix as a function of  $Q$  in  $V_{\text{Sb}}$ -containing supercell [(a) for VBM and (b) for CBM] and  $V_{\text{N}}$ -containing supercell [(c) for VBM and (d) for CBM]. Here, the initial state  $\psi_i$  is the perturbed band-edge states (VBM or CBM), while the final state  $\psi_f$  is the localized

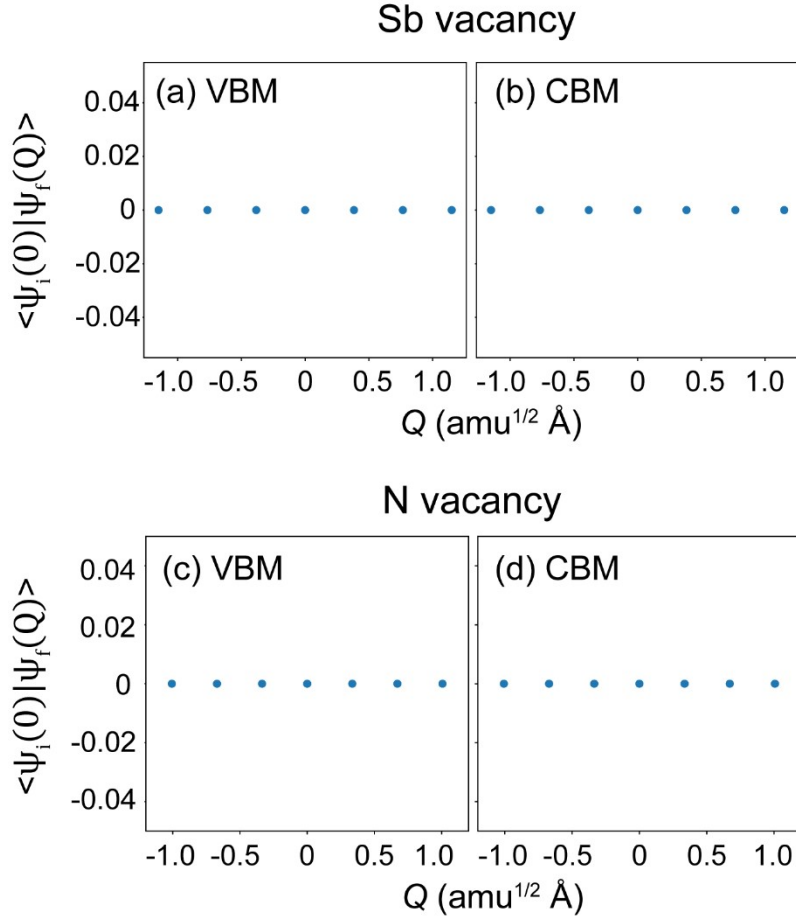

defect state.

Note that a single electron-phonon coupling matrix element  $W_{if}$  is given by:

$$W_{if} = \langle \psi_i | \partial \hat{H} / \partial Q | \psi_f \rangle,$$

where  $\hat{H}$  is the Hamiltonian operator of the system. As a first-order approximation, this matrix element can be evaluated by:

$$W_{if} \approx (\epsilon_f - \epsilon_i) \langle \psi_i | \partial \psi_f / \partial Q \rangle,$$

where  $\epsilon_f$  and  $\epsilon_i$  is the eigenvalue of the final and initial states, respectively.  $\langle \psi_i | \partial \psi_f / \partial Q \rangle$  can be calculated from the slope of the overlap matrix versus  $Q$  curve. As shown in Fig S4, the slope of the overlap matrix is negligible for both  $V_{\text{Sb}}$  and  $V_{\text{N}}$  defects.
